# Supplementary material
Source: Springer Nature journal article supplement (https://www.springermedizin.de/resource/supplementary/12986_2011_315_MOESM1_ESM.pdf/25655814)

## **A** Study 1: One biopsy approach validation

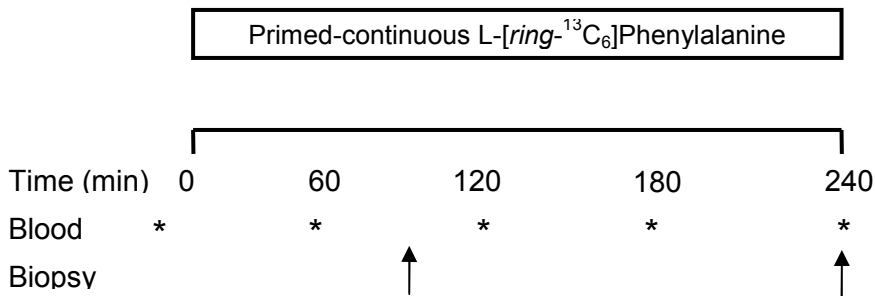

## **B** Study 2: Steady-state confirmation

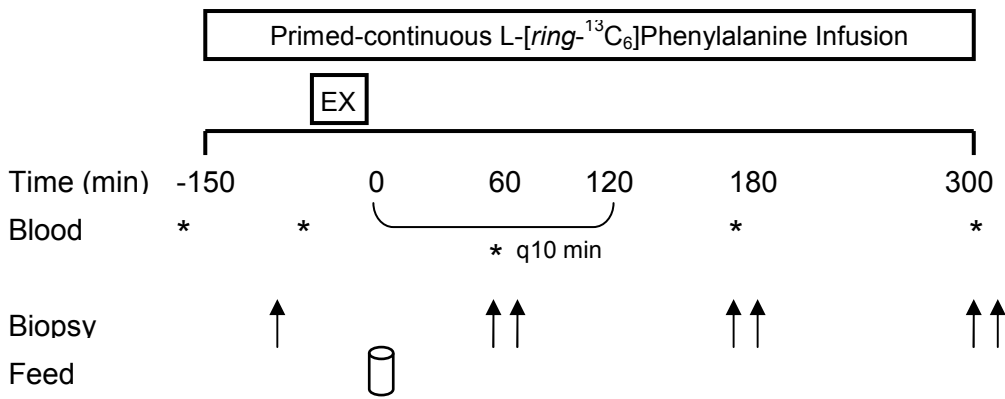

Supplement: MOESM1 [file 25655814]
